# Supplementary material for: Plastid signalling under multiple conditions is accompanied by a common defect in RNA editing in plastids
Source: PubMed Central journal article supplement — J Exp Bot. 2011 Sep 16;63(1):251–60. doi: 10.1093/jxb/err257 (PMC3245456; doi:10.1093/jxb/err257), 2011-09-16
Supplement: supp_err257_00066688-file001.pdf [file supp_err257_00066688-file001.pdf]

**Plastid signaling under multiple conditions is accompanied by a common defect in  
RNA editing in plastids**

Tomohiro Kakizaki, Fumiko Yazu, Katsuhiro Nakayama, Yasuko Ito-Inaba and Takehito  
Inaba

Supplementary materials

Table S1 and S2, and Figs S1, S2 and S3

Table S1. Gene-Specific Primers Used in Real-time PCR

| Gene Name                        | AGI code  | Forward Primer                        | Reverse Primer                     |
|----------------------------------|-----------|---------------------------------------|------------------------------------|
| <i>ACTIN2</i>                    | At3g18780 | 5'-GCACCCTGTTCTTCTTACCG-3'            | 5'-AACCCCTCGTAGATTGGCACA-3'        |
| <i>LHCB1</i>                     | At1g29930 | 5'-AGCTCAAGAACCGAAGATTGG-3'           | 5'-GCCAAATGGTCAGCAAGGTT-3'         |
| <i>SSU1A</i>                     | At1g67090 | 5'-CCTCAAAACTTTATCCCCATC-3'           | 5'-AATATGTCTCGCAAACCGGAAA-3'       |
| <i>OE23</i>                      | At1g06680 | 5'-TGTGTTGACAAGAACGGCTGAT-3'          | 5'-CTTGTCTCCAGCTTGTGCTTTG-3'       |
| <i>GUN4</i>                      | At3g59400 | 5'-TCAAGTGGGAGCTTAACGATGA-3'          | 5'-TACTCCTGCCTGTTCCCTTAGCC-3'      |
| <i>CA1</i>                       | At3g01500 | 5'-CCCTTAGATGGAAACAACCTCCACTGACTTC-3' | 5'-GGCCACATTGATCTTCAAAGGCTGAATC-3' |
| <i>psbO1</i>                     | At5g66570 | 5'-AACGGCTAACCCAGTGCCCTA-3'           | 5'-CTGGAGGAGCGTTCCTTGCTT-3'        |
| <i>psaF</i>                      | At1g31330 | 5'-CTGAATCTGCCCTGCTCTT-3'             | 5'-AACCGTCTGACCCGCATAAC-3'         |
| <i>peth2</i>                     | At5g66190 | 5'-ACTACCGAGGCACCACCAGT-3'            | 5'-CCGGTGTATCTTGGTGTTCAA-3'        |
| <i>petE2</i>                     | At1g20340 | 5'-AGGGGATGGGTGCTTAGCTT-3'            | 5'-GCCACTTGGGATCTCGTCTT-3'         |
| <i>LHCB2.1</i>                   | At2g05100 | 5'-AAGTCGTGAATGACTTATTGGTG-3'         | 5'-GGTGGTGTGGTTCAATAAGGT-3'        |
| <i>PDH-E1<math>\alpha</math></i> | At1g01090 | 5'-TGCAAAGGAAGCAGAGCTAAAG-3'          | 5'-CCTCACATCTGTACCGTCCATC-3'       |
| <i>Hsp93</i>                     | At5g50920 | 5'-AGGAAGATTCTCTCCCTGTTGCT-3'         | 5'-TTAAGAAAGCCCCATGTATCTC-3'       |
| <i>IEP37</i>                     | At3g63410 | 5'-GTTCAAGAATGCCGTTTCAAG-3'           | 5'-ACCAAGCTGGAGAGGAGAGTCA-3'       |
| <i>atTIC110</i>                  | At1g06950 | 5'-CTGCTTCTCCGACCAACTA-3'             | 5'-CTGAAGTCGCTAGCCTCACC-3'         |
| <i>CM1</i>                       | At3g29200 | 5'-GAAGAAGGAATGAATCTCATGTT-3'         | 5'-CCAAAGCCATATTGTTTATTTTGT-3'     |
| <i>COL6</i>                      | At1g68520 | 5'-AGGCCTCGCATGAAAGGAAGGT-3'          | 5'-ACATACGTAGCTCACAAAAACGTGCA-3'   |
| <i>COL16</i>                     | At1g25440 | 5'-TGGGGAGGTCAAGGTCCACCG-3'           | 5'-GGAAAAGGCTGGCCAACCGC-3'         |
| <i>RD26</i>                      | At4g27410 | 5'-AGCACGAATGGGTGCTCATCGT-3'          | 5'-AGACCTGCCAAGCTAGCCCA-3'         |
| <i>HFR</i>                       | At1g02340 | 5'-TGATGTCAACAGTGGGGTGAATCC-3'        | 5'-GGCCGTGAGCCGAAGCCATT-3'         |
| <i>ZnFinger</i>                  | At5g44260 | 5'-GTTTAGCCGTCACGGTGATT-3'            | 5'-CTGACGTGGAGAATGAGCAA-3'         |
| <i>SIG6</i>                      | At2g36990 | 5'-AGAAGCAGCCGGGAAAAGTT-3'            | 5'-CCATGCTTCTTCTCGCAAT-3'          |
| <i>COL4</i>                      | At5g24930 | 5'-CGAAGCGGACGGATACAAAT-3'            | 5'-CAAACCACCCACCATTCTCC-3'         |
| <i>bHLH-II</i>                   | At2g18300 | 5'-CATGGGTTTTGGTCTCCAC-3'             | 5'-TTCTTCAAGCAACGGCTCT-3'          |
| <i>COL13</i>                     | At2g47890 | 5'-GCGACTCCTGCAACGAATCT-3'            | 5'-GGGACAGCCGGTAAATCCTT-3'         |
| <i>BES1</i>                      | At1g19350 | 5'-TCATTCCCAGTCTTCTCG-3'              | 5'-CTGGTGGAGTGACAGGAGCA-3'         |
| <i>COL5</i>                      | At5g57660 | 5'-TAGCTCGACGACTGGTGGTG-3'            | 5'-TGGCCGTGACTCTGCATAAG-3'         |
| <i>IDD4</i>                      | At2g02080 | 5'-AACGCGGGTCTAACGTGTC-3'             | 5'-CAGATGGGTGCTTGTG-3'             |
| <i>BHLH071</i>                   | At5g46690 | 5'-CTCGTCGATCTCGAGCCATT-3'            | 5'-TTCGTAGCTGGTGGTTGTCG-3'         |
| <i>OBP4</i>                      | At5g60850 | 5'-AGATCGAACGGCTCAGGTTG-3'            | 5'-GTTTGATCTCCACCGCCACT-3'         |
| <i>GLK1</i>                      | At2g20570 | 5'-TTGGGTCTCCGATTCTCCCTAT-3'          | 5'-GCAACTGGCGGTGCTCTAAAT-3'        |
| <i>BBX27</i>                     | At1g68190 | 5'-TCATGGTGGTGGCTCTCTG-3'             | 5'-CCGCGAAATCTTTAGCAGGA-3'         |
| <i>PIF3</i>                      | At1g09530 | 5'-AATGGGCTTGCTGATTTGA-3'             | 5'-ATACCCATCGCCACTGGTTG-3'         |
| <i>bHLH-I</i>                    | At1g10585 | 5'-AGTCGGATTGGCATTGATCC-3'            | 5'-TCATTTGGGATTTTCATGCTTCA-3'      |
| <i>SEP3</i>                      | At1g24260 | 5'-CGGTCGTCATCATCAACA-3'              | 5'-CACTTGGTCTGCTCCCAT-3'           |
| <i>jmjC</i>                      | At3g20810 | 5'-GACGAAACCGAGTTCCAAA-3'             | 5'-TTCATTGCTCCACCAGAAGC-3'         |
| <i>ERF6</i>                      | At4g17490 | 5'-TGACGGCGATAGTAGCTGG-3'             | 5'-CAAACGGTGGGTGTGGAGAT-3'         |
| <i>CIR7</i>                      | At5g37260 | 5'-TGGCTCAGATGGATTAGTTCC-3'           | 5'-GGCTCTGTTTGGTCTCTGCTTC-3'       |
| <i>OTP86</i>                     | At3g63370 | 5'-CCGGGAAATCTTGTGCTTGT-3'            | 5'-GCCGTCCATCTCAATCCAAC-3'         |
| <i>ECB2</i>                      | At1g15510 | 5'-TGCTGATTGTGAAAATGGA-3'             | 5'-ATCGCTAAGAAAGGCGTGAA-3'         |
| <i>RARE1</i>                     | At5g13270 | 5'-CCTGGGCTGAAAATGGGAAGAAGC-3'        | 5'-ACCCTTTTCTTGATCCAGCTGCA-3'      |
| <i>CRR22</i>                     | At1g11290 | 5'-GGTGCCATGTTAGGTGCTTGCCA-3'         | 5'-TGCGCAGACCCTGTCTCAACA-3'        |
| <i>CRR28</i>                     | At1g59720 | 5'-CGCAGGAGACACGTCGCATCC-3'           | 5'-AGGTGCTTGAGAGCGATCCGGT-3'       |
| <i>OTP85</i>                     | At2g02980 | 5'-GATTCACACGGTGGCGATTA-3'            | 5'-AACCGCCTTTCGATCTTTCA-3'         |
| <i>OTP84</i>                     | At3g57430 | 5'-ATCAGCAGGCCTCTGGGATA-3'            | 5'-TTGCGGGTGAGATGAGTCAC-3'         |
| <i>OTP82</i>                     | At1g08070 | 5'-GAATGTCGAGTTGGGCGAAT-3'            | 5'-TCGTTCCATCTTCTGCTGA-3'          |
| <i>LPA66</i>                     | At5g48910 | 5'-TTGCAGAATGCAGGAAATG-3'             | 5'-GAGGGCGACATAAGCTCCAC-3'         |
| <i>CRR21</i>                     | At5g55740 | 5'-TGCTGCTGCACGTAAGTGA-3'             | 5'-AACAAATGCTGCCACACTTGG-3'        |
| <i>CRR4</i>                      | At2g45350 | 5'-CTCAGCTTGGCCGATTATCC-3'            | 5'-TTGTATGCTTCCGATTTCCG-3'         |

\*:Primer set for *ACTIN2* is described in Vazquez et al. (2004).

Table S2. Primers Used in RNA editing analysis

| Primer Set   | Forward Primer                | Reverse Primer                |
|--------------|-------------------------------|-------------------------------|
| <i>ndhA</i>  | 5'-GGAATCATAACAGGTGTAAGTAG-3' | 5'-GTACTTAAACTGTTAGATAGTAG-3' |
| <i>ndhB</i>  | 5'-TGCTTCTCTTCGATGGAAG-3'     | 5'-TCCTTCGTATACGTCAGG-3'      |
| <i>ndhB2</i> | 5'-TCCCCTCCAGTCGTTG-3'        | 5'-TGAGCAATCGCAATAATCG-3'     |
| <i>ndhD</i>  | 5'-AGTACGCGTTCTTTGGAC-3'      | 5'-TAGCTCCATTAAGTCCAGG-3'     |
| <i>ndhF</i>  | 5'-CATTCCACTTCCAGTACC-3'      | 5'-ATTCGCTGCAATAGGTGCG-3'     |
| <i>ndhG</i>  | 5'-TGCCTGGACCAATACATG-3'      | 5'-ATTCCCAATGGTCCACAG-3'      |
| <i>accD</i>  | 5'-ATTCAATGCGACAATTGTTATG-3'  | 5'-CATCCATAGGATTCCAAGTAC-3'   |
| <i>atpF</i>  | 5'-CCGATTCTTTGTTTTACTTG-3'    | 5'-CACTCCCTTTCCAAAAAAG-3'     |
| <i>clpP</i>  | 5'-AATGATCCATCAACCCGC-3'      | 5'-ATTGAACCGCTACAAGATC-3'     |
| <i>matK</i>  | 5'-TACCTTACCCATCCATC-3'       | 5'-CAGAATGCATCTTCCGTG-3'      |
| <i>petL</i>  | 5'-ATATTTTATTGAGTCCCTTC-3'    | 5'-TCAAATAAGTCGTATTTTGC-3'    |
| <i>psbE</i>  | 5'-TATGTCTGGAAGCACAGG-3'      | 5'-TAAATTCATCGAGTTGTTCC-3'    |
| <i>psbF</i>  | 5'-TTTACAGTGCCTGGTTG-3'       | 5'-TTATCGTTGGATGAACTGC-3'     |
| <i>rpoB</i>  | 5'-TCAATTGGTAGAACCTCTG-3'     | 5'-TATTTGCGGCACCAATCC-3'      |
| <i>rpoB2</i> | 5'-TTAACACCTCAAGTGGCG-3'      | 5'-TCTCTCATCAAAGGGGC-3'       |
| <i>rps14</i> | 5'-ATAGGGAGAAGAAGAGGC-3'      | 5'-TGGCAACAAACATGCCTG-3'      |

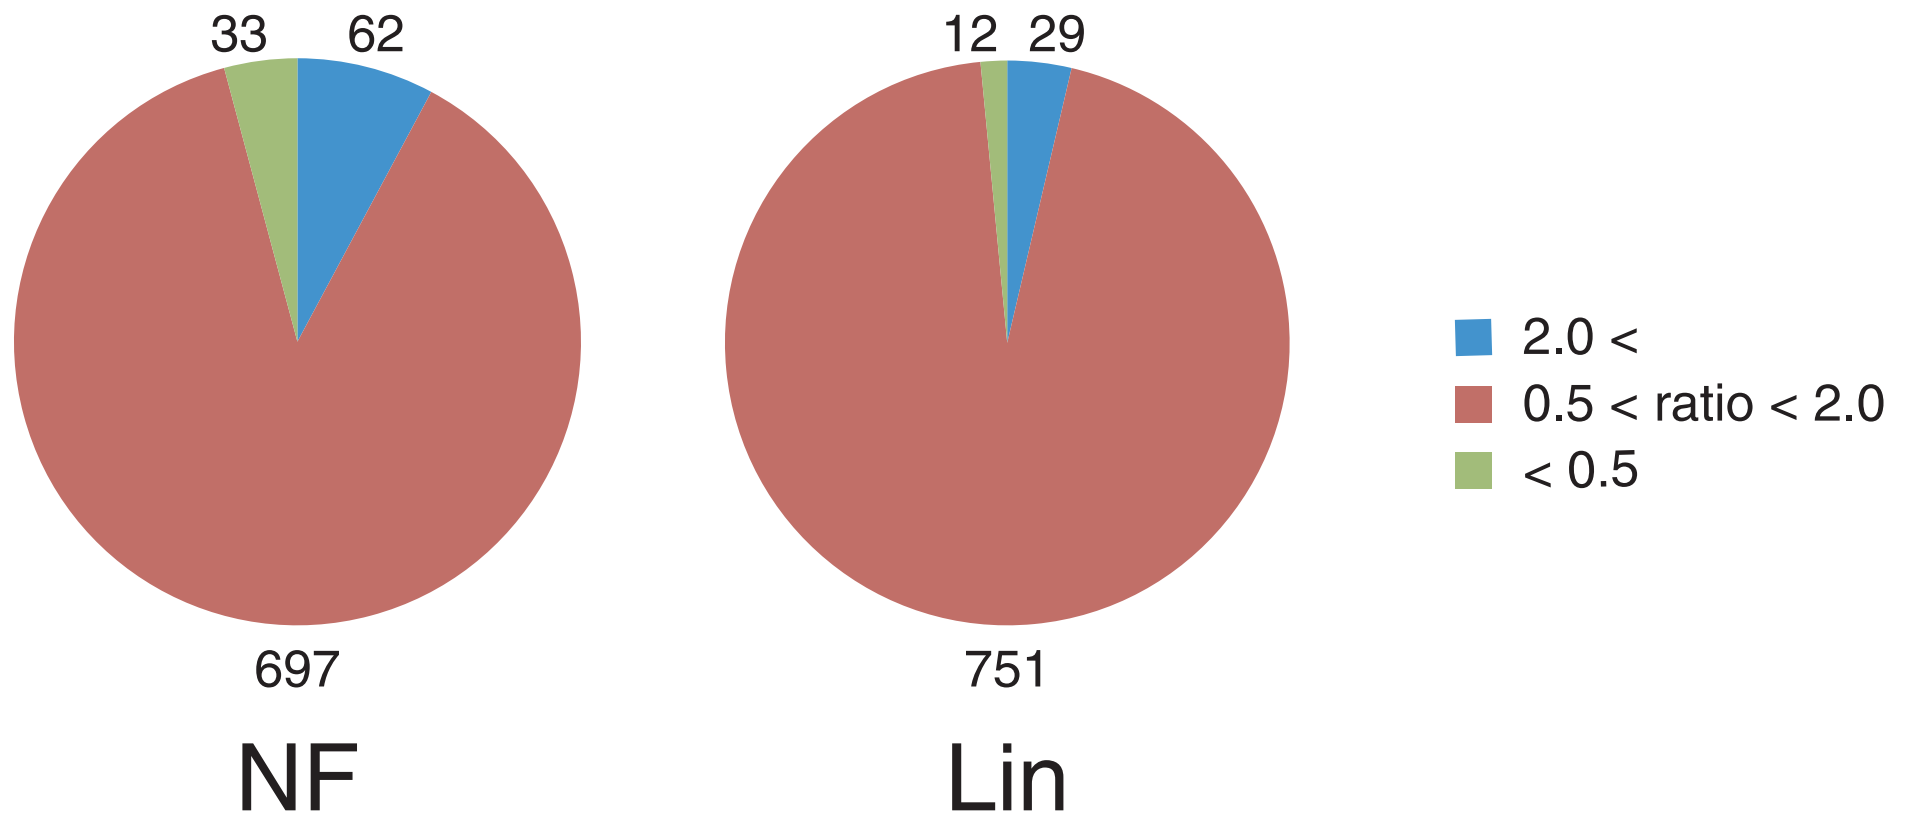

**Fig. S1. Comparison of gene expression profile in *ppi2-1* mutant with those in Norflurazon (NF) and lincomycin (Lin) treated wild-type plants.**

The 1000 most up-regulated genes in the *ppi2-1* mutant (Kakizaki et al., 2009) were chosen for the analysis. Response of these 1000 genes to NF or Lin treatment in wild-type plants was investigated *in silico* using existing microarray dataset (NASCARRAYS-51 and NASCARRAYS-336). Blue, genes up-regulated by inhibitor treatment; Red, genes unchanged by inhibitor treatment; green, genes down-regulated by inhibitor treatment. Note that all of these genes are up-regulated by *ppi2-1* mutation.

|                      | Col-0     | <i>gun1-101</i> |
|----------------------|-----------|-----------------|
| <i>accD</i> (794)    | CTTTGATT  | CTTTGATT        |
| <i>rps14-1</i> (80)  | TCCTAAAA  | TCCTAAAA        |
| <i>rps14-2</i> (148) | TCCCTACCG | TCCCTACCG       |

**Fig. S2. Analysis of chloroplast RNA editing in *gun1-101* mutant.**

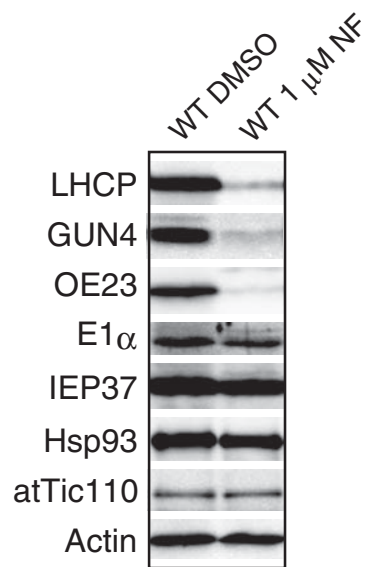

**Fig. S3. Effects of NF treatment on the accumulation of plastid proteins.**

Total protein extracts were resolved by SDS-PAGE and probed with antisera against the proteins indicated to the left of the panel.
